# Supplementary material for: Naphthalene-Based Oxime Esters as Type I Photoinitiators for Free Radical Photopolymerization
Source: MDPI journal article supplement (doi:10.3390/polym14235261), 2022-12-02
Supplement: s1 [file s1]

## Supporting Information

### **Naphthalene-based oxime esters as Type I photoinitiators for free radical photopolymerization**

**Zhong-Han Lee<sup>a</sup>, Fatima Hammoud<sup>b,c,d</sup>, Tung-Liang Huang<sup>a</sup>, Akram Hijazi<sup>d</sup>, Bernadette Graff<sup>b,c</sup>, Jacques Lalevée<sup>b,c\*</sup>, Yung-Chung Chen<sup>a,e\*</sup>**

<sup>a</sup>. Department of Chemical and Materials Engineering, National Kaohsiung University of Science and Technology, Kaohsiung 80778, Taiwan

<sup>b</sup>. Université de Haute-Alsace, CNRS, IS2M UMR 7361, F-68100, Mulhouse, France

<sup>c</sup>. Université de Strasbourg, France

<sup>d</sup>. EDST, Université Libanaise, Campus Hariri, Hadath, Beyrouth, Liban

<sup>e</sup>. Photo-SMART (Photo-sensitive Material Advanced Research and Technology Center), National Kaohsiung University of Science and Technology, Kaohsiung City 80778, Taiwan

\*Corresponding authors: JacquesLalevée (jacques.lalevee@uha.fr)

Yung-Chung Chen (chenyc@nkust.edu.tw)

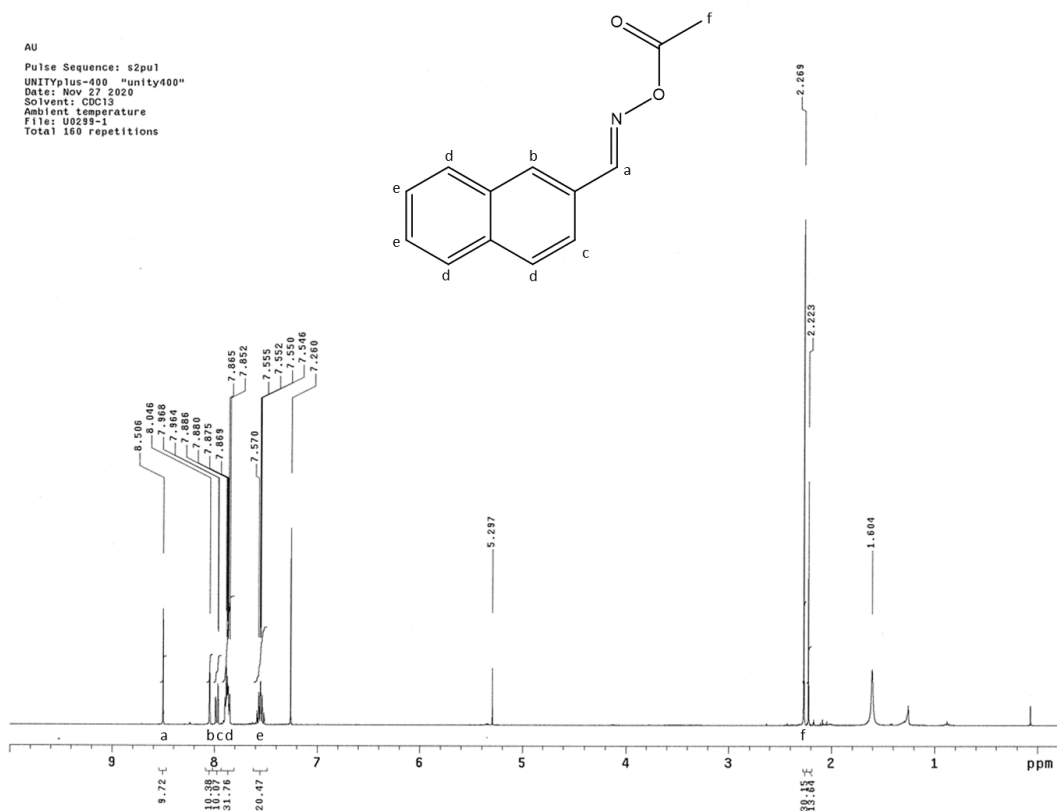

Figure S1  $^1\text{H}$  NMR of the NA-1.

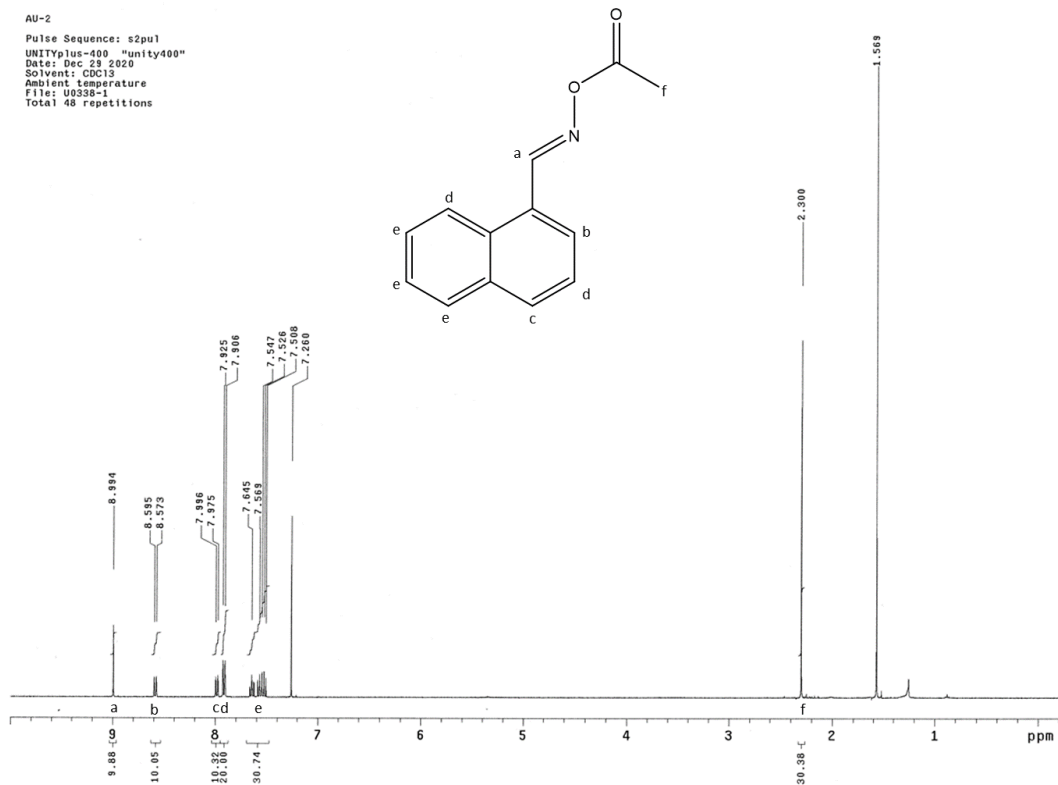

Figure S2 <sup>1</sup>H NMR of the NA-2.



NA-4  
Pulse Sequence: s2pu1  
UNITYplus-400 "unity400"  
Date: Jun 2 2021  
Solvent: CDCl3  
Ambient temperature  
File: U0141-2  
Total 44 repetitions

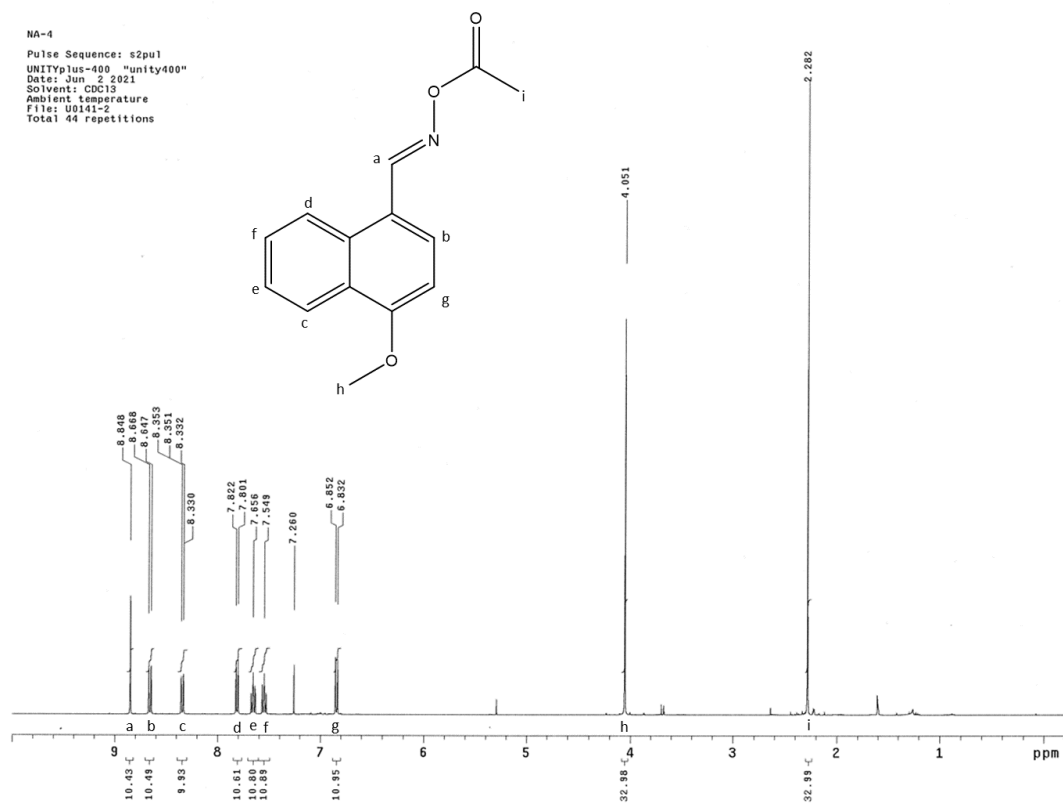

**Figure S4**  $^1\text{H}$  NMR of the NA-4.

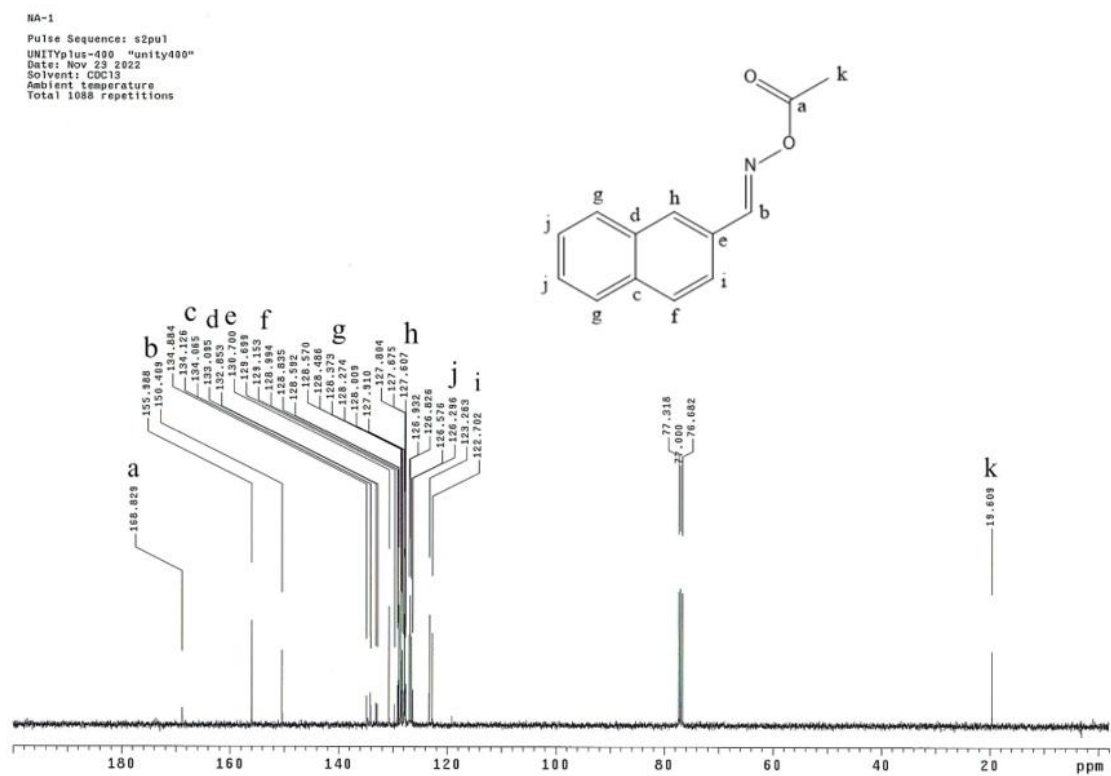

Figure S5 <sup>13</sup>C NMR of the NA-1.

NA-2  
Pulse Sequence: s2pu1  
UNITYplus-400 "unity400"  
Date: Nov 24 2022  
Solvent: CDCl3  
Ambient temperature  
Total 1248 repetitions

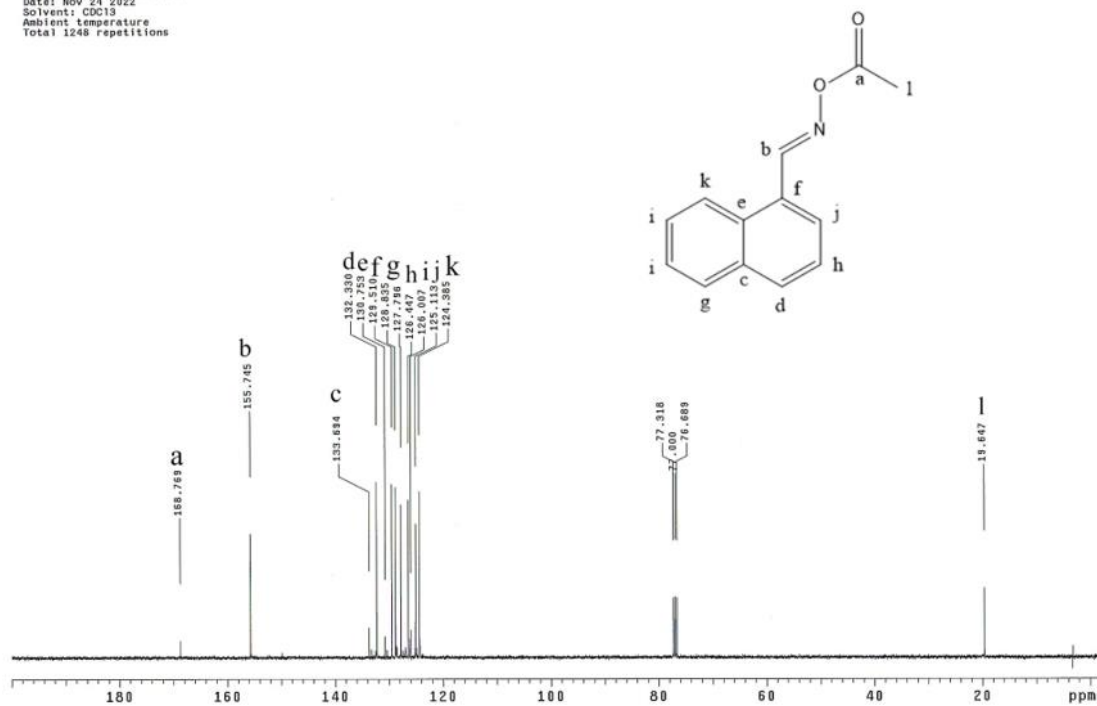

Figure S6 <sup>13</sup>C NMR of the NA-2.

NA-3  
Pulse Sequence: s2pul  
UNITYplus-400 "unity400"  
Date: Nov 23 2022  
Solvent: CDCl<sub>3</sub>  
Ambient Temperature  
Total 3200 repetitions

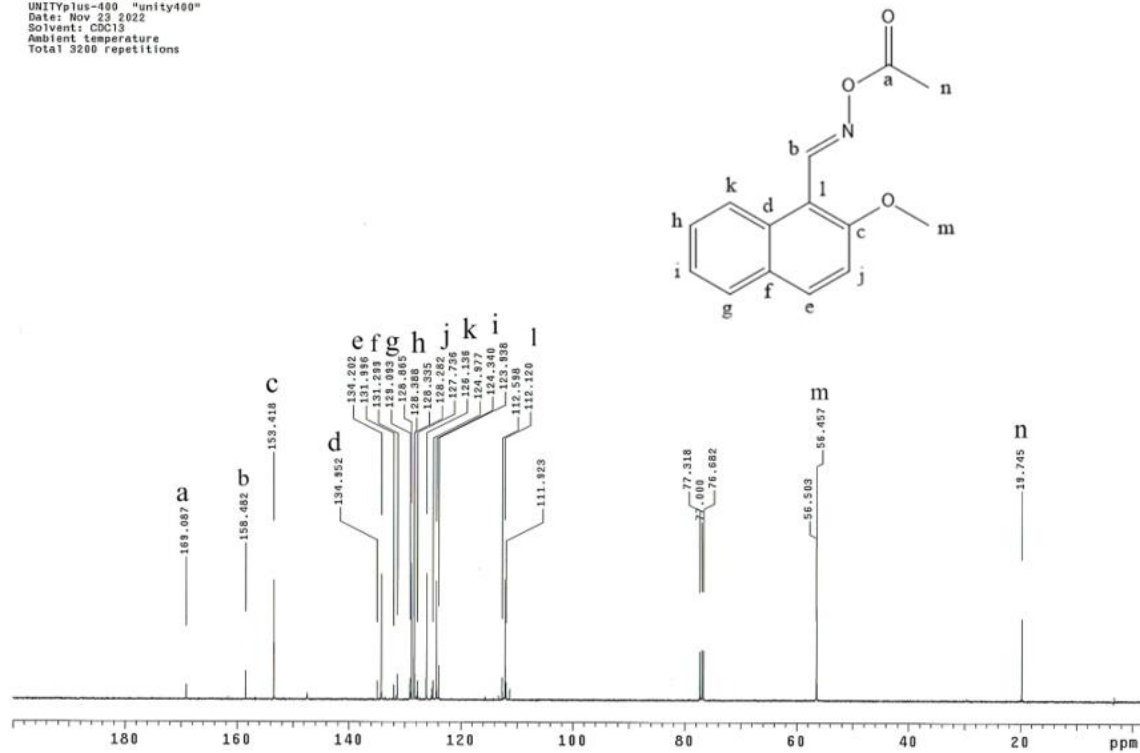

**Figure S7** <sup>13</sup>C NMR of the NA-3.



NA-4  
Pulse Sequence: s2pu1  
UNITYplus-400 "unity400"  
Date: Nov 24 2022  
Solvent: CDCl3  
Ambient temperature  
Total 768 repetitions

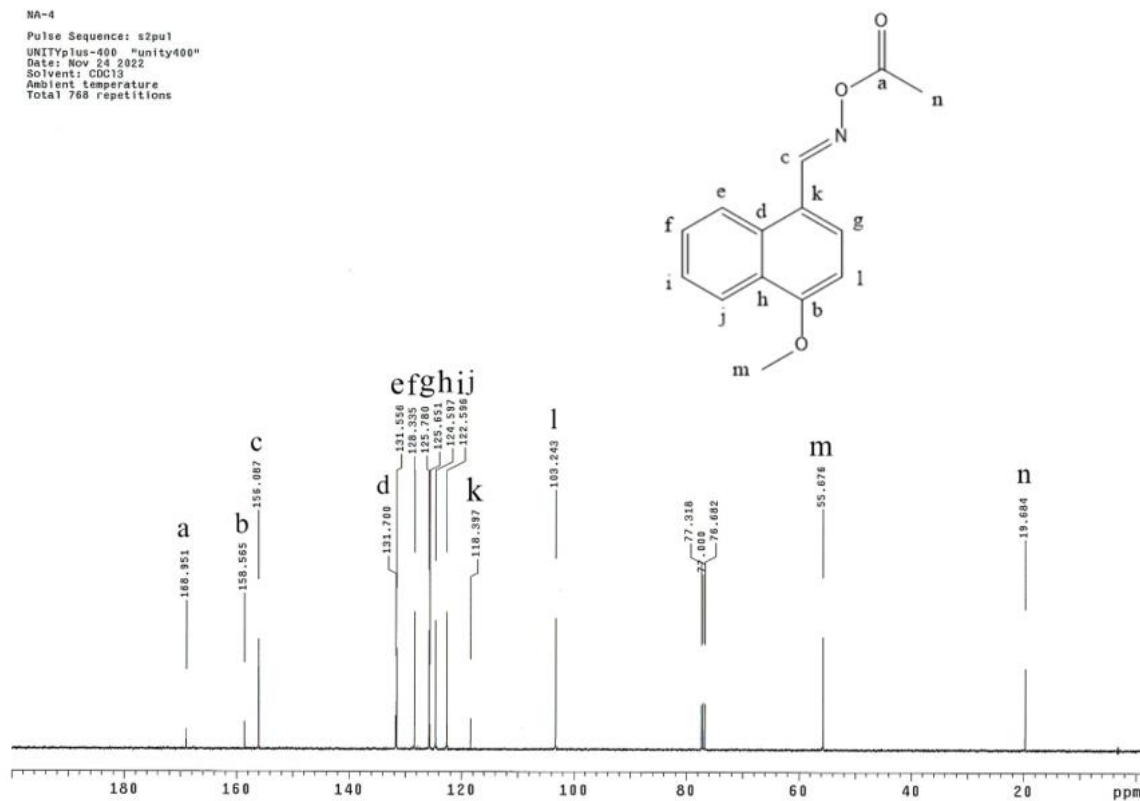

Figure S8  $^{13}\text{C}$  NMR of the NA-4.

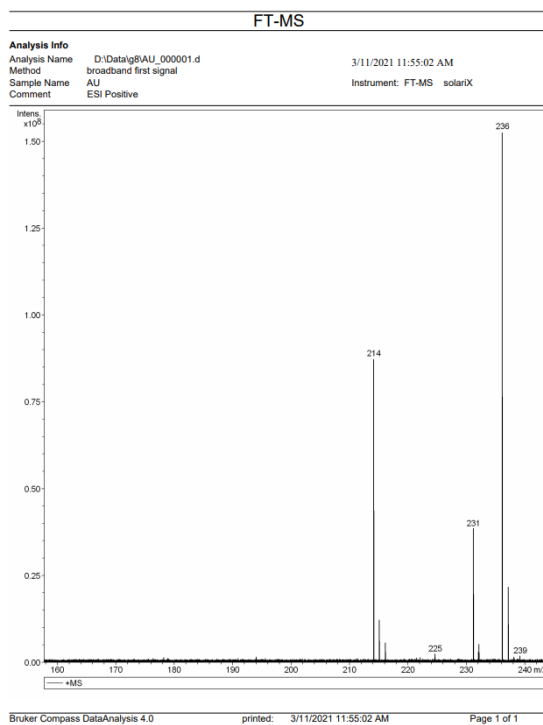

## Mass Spectrum SmartFormula Report

**Analysis Info**

Analysis Name: D:\Data\g8\AU\_000002.d  
Method: broadband first signal  
Sample Name: AU  
Comment: ESI Positive

3/11/2021 11:54:20 AM  
Operator: YU HSIAO-CHING  
Instrument: BRUKER FT-MS solarix

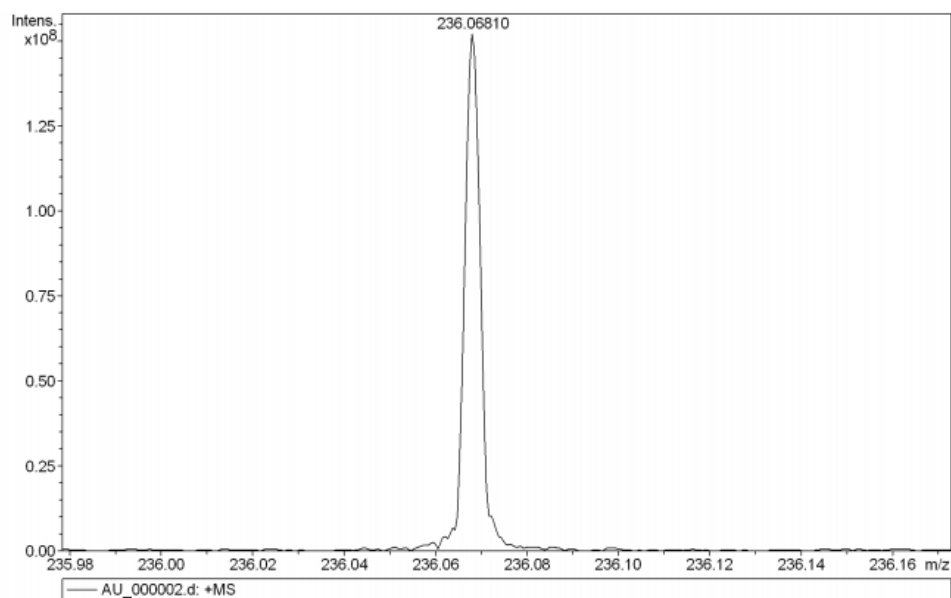

| Meas. m/z | # | Formula            | Score  | m/z       | err [mDa] | err [ppm] | mSigma | rdb | e <sup>-</sup> Conf | N-Rule |
|-----------|---|--------------------|--------|-----------|-----------|-----------|--------|-----|---------------------|--------|
| 236.06810 | 1 | C 13 H 11 N Na O 2 | 100.00 | 236.06820 | 0.10      | 0.42      | 6.8    | 8.5 | even                | ok     |

**Figure S9** Fourier-transfer mass spectrometry (FT-MS) of the **NA-1**.

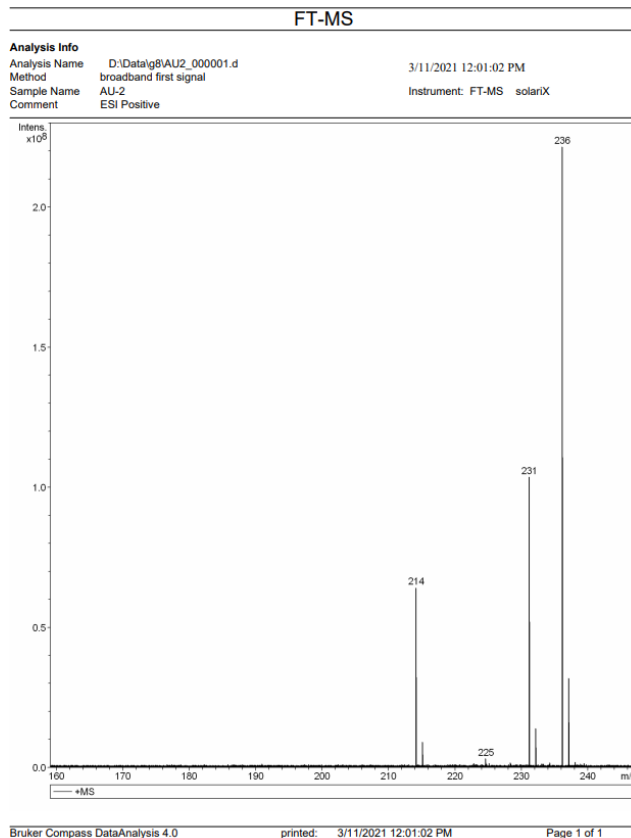

### Mass Spectrum SmartFormula Report

|                      |                         |                                  |
|----------------------|-------------------------|----------------------------------|
| <b>Analysis Info</b> |                         |                                  |
| Analysis Name        | D:\Data\g8\AU2_000002.d | 3/11/2021 12:00:22 PM            |
| Method               | broadband first signal  | Operator: YU HSIAO-CHING         |
| Sample Name          | AU-2                    | Instrument: BRUKER FT-MS solarIX |
| Comment              | ESI Positive            |                                  |

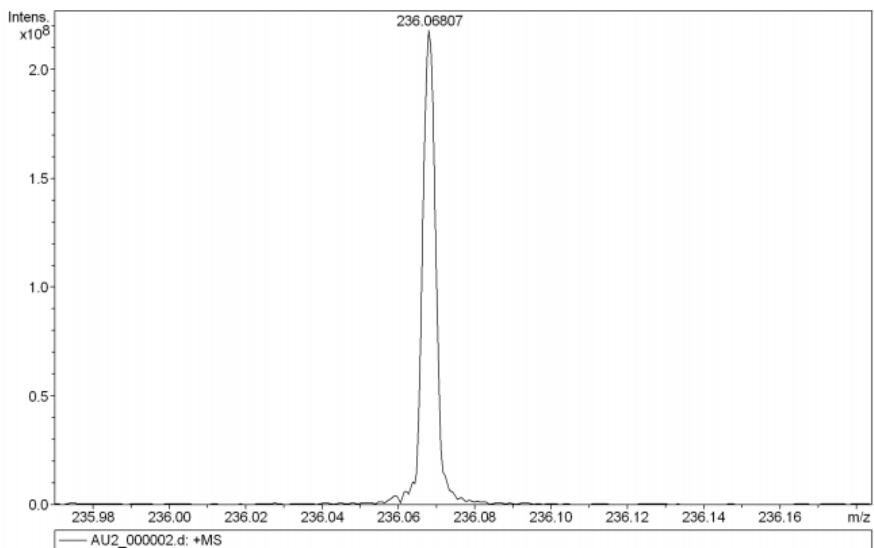

| Meas. m/z | # | Formula            | Score  | m/z       | err [mDa] | err [ppm] | mSigma | rdb | e <sup>-</sup> Conf | N-Rule |
|-----------|---|--------------------|--------|-----------|-----------|-----------|--------|-----|---------------------|--------|
| 236.06807 | 1 | C 13 H 11 N Na O 2 | 100.00 | 236.06820 | 0.13      | 0.55      | 2.0    | 8.5 | even                | ok     |

**Figure S10** Fourier-transfer mass spectrometry (FT-MS) of the **NA-2**.

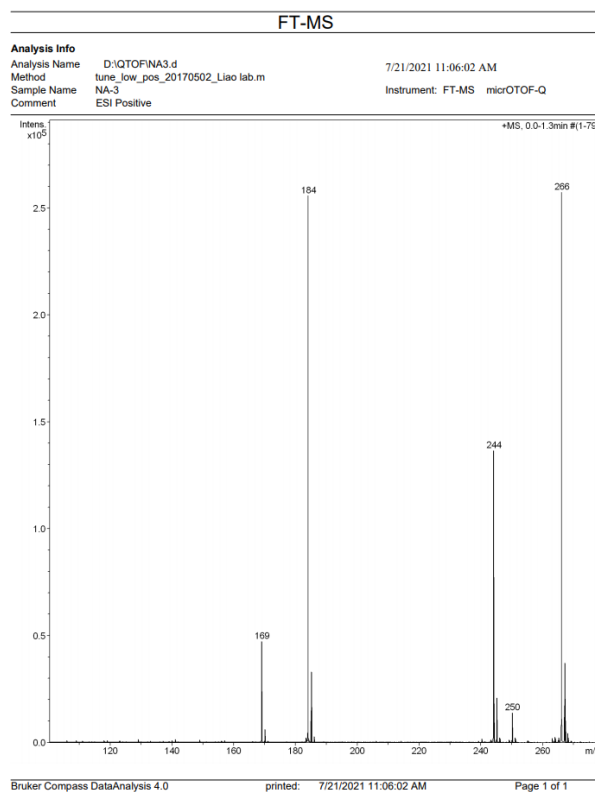

### Mass Spectrum SmartFormula Report

**Analysis Info**

Analysis Name: D:\QTOF\NA3H1.d  
Method: tune\_low\_pos\_20170502\_Liao lab.m  
Sample Name: NA-3  
Comment: ESI Positive

7/21/2021 11:09:28 AM  
Operator: YU HSIAO-CHING  
Instrument: BRUKER FT-MS micrOTOF-Q

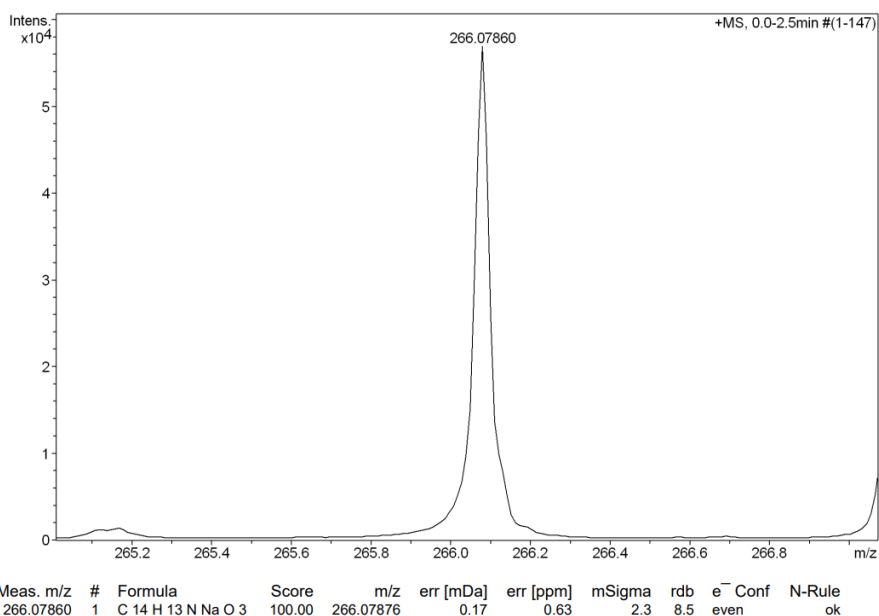

**Figure S11** Fourier-transfer mass spectrometry (FT-MS) of the **NA-3**.

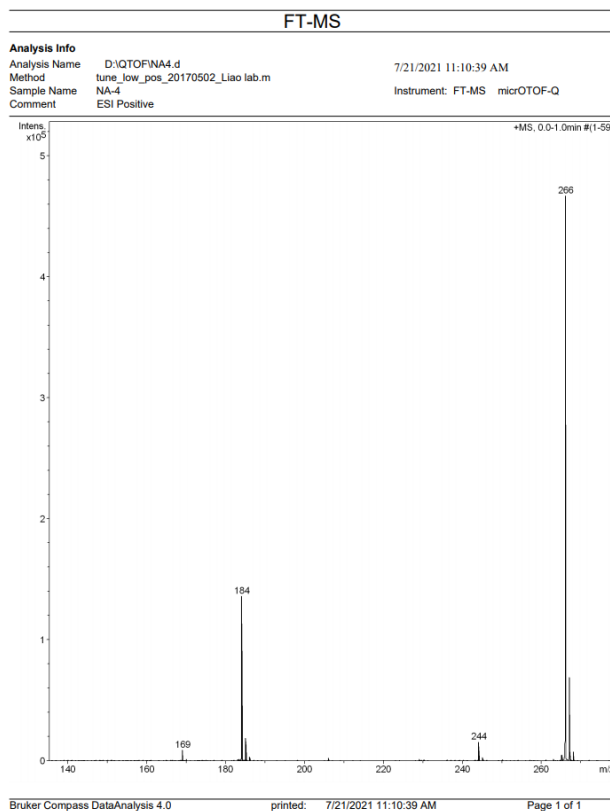

### Mass Spectrum SmartFormula Report

**Analysis Info**  
Analysis Name: D:\QTOF\NA4H3.d  
Method: tune\_low\_pos\_20170502\_Liao lab.m  
Sample Name: NA-4  
Comment: ESI Positive

7/21/2021 11:12:29 AM  
Operator: YU HSIAO-CHING  
Instrument: BRUKER FT-MS microTOF-Q

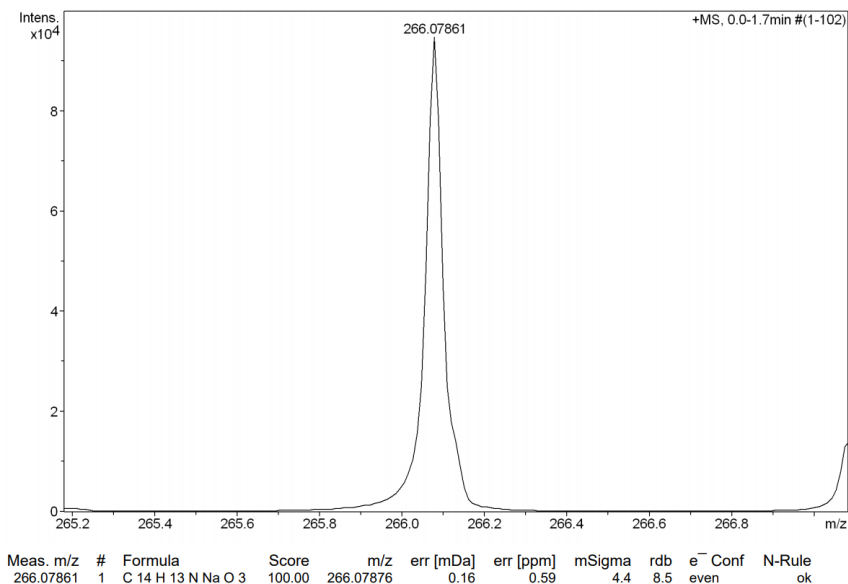

**Figure S12** Fourier-transfer mass spectrometry (FT-MS) of the **NA-4**.
